# Supplementary material for: Significant climate impacts of aerosol changes driven by growth in energy use and advances in emission control technology
Source: Copernicus journal article supplement (doi:10.5194/acp-19-14517-2019), 2019-11-29
Supplement: Supplementary file 1 [file acp-19-14517-2019-supplement.pdf]

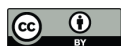

*Supplement of*

**Significant climate impacts of aerosol changes driven by growth in energy use and advances in emission control technology**

**Alcide Zhao et al.**

*Correspondence to:* Alcide Zhao ([alcide.zhao@ed.ac.uk](mailto:alcide.zhao@ed.ac.uk))

The copyright of individual parts of the supplement might differ from the CC BY 4.0 License.

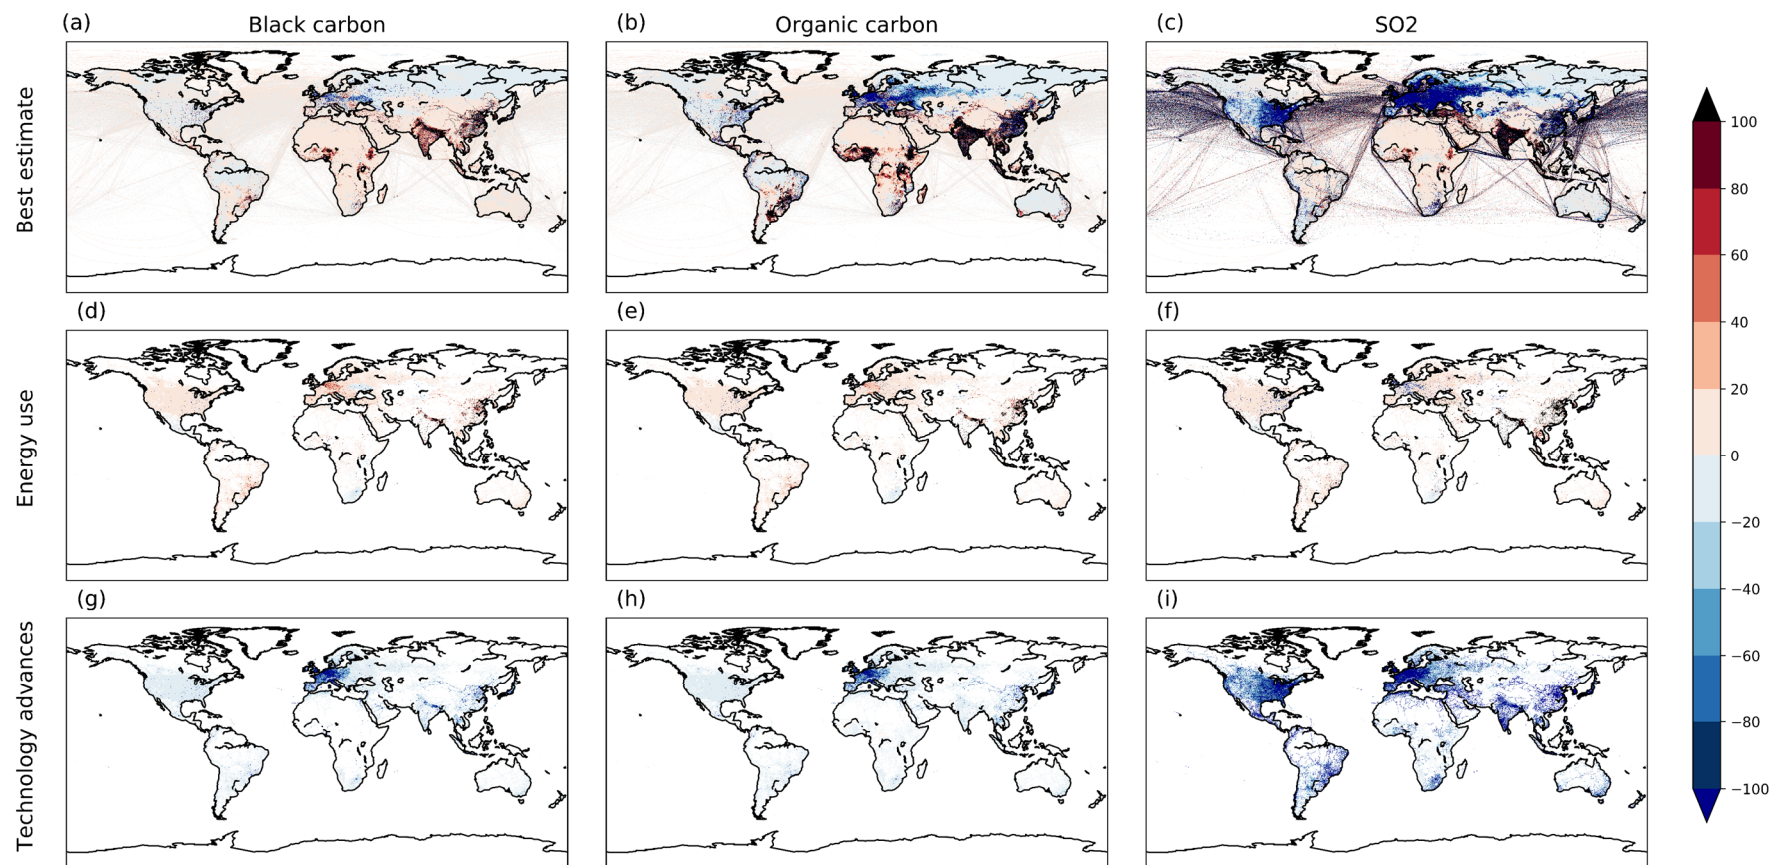

**Figure S1** The 1970-2010 emission changes (kg m<sup>-2</sup> yr<sup>-1</sup>) of black carbon (first column), organic carbon (second column) and sulphate species (SO<sub>2</sub>; third column). They are (a-c) the best estimate, (d-f) changes due to energy use growth, and (g-h) changes due to technology advances.

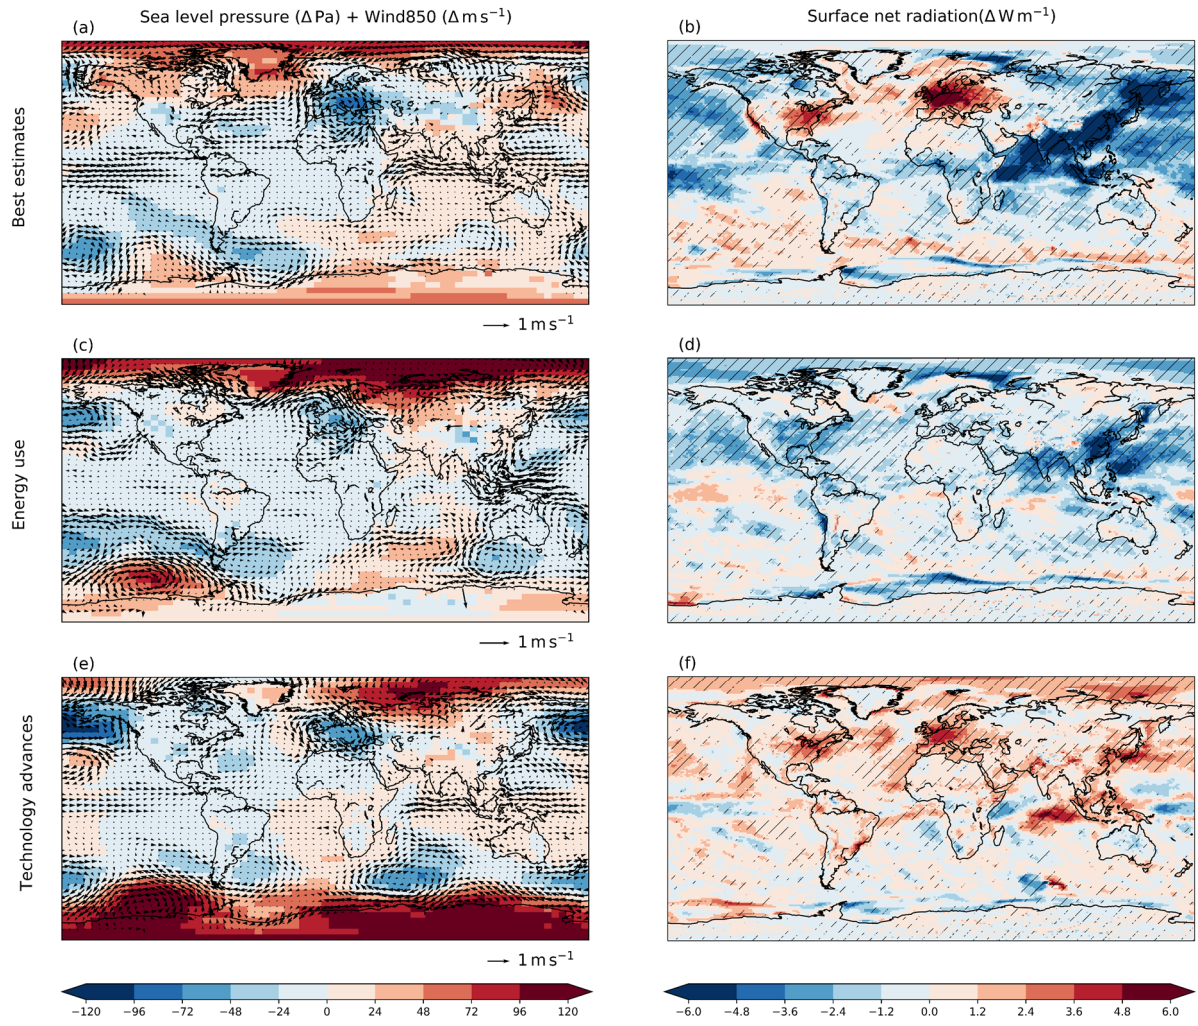

**Figure S2** The same as Figure 4 in the main text, but for changes in sea-level pressure (shadings, Pa) and 850 hPa winds (vectors,  $\text{m s}^{-2}$ ) in the left column, as well as surface net radiation ( $\text{W m}^{-2}$ ).



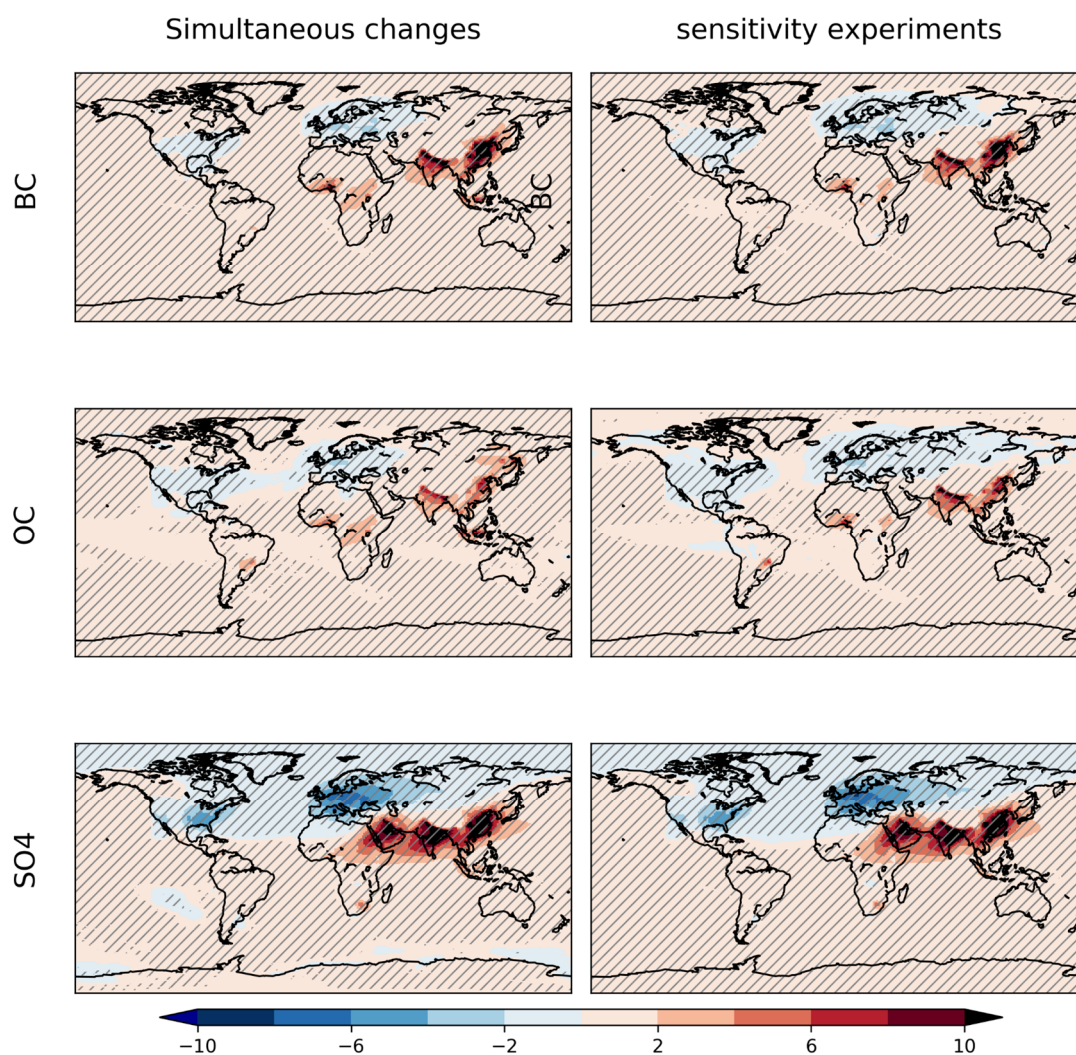

**Figure S3** The model simulated 1970-2010 changes in the total column aerosol burden (kg m<sup>-2</sup>) of black carbon (BC, top row), organic carbon (OC, middle row), and sulphate (SO<sub>4</sub>, bottom row). The left column are from the experiment where all aerosol species change simultaneously. The right column corresponds to the sensitivity experiment where only the targeted aerosol species changes.
